# Supplementary material for: Insight into the dual action mechanism of 3V-PPh3 polymers as carriers and ligands in the Rh/3V-PPh3 heterogeneous catalytic hydroformylation of ethylene to propionaldehyde
Source: Royal Society of Chemistry journal article supplement (doi:10.1039/d1cp04617a), 2022-01-01
Supplement: d1cp04617a1.pdf [file d1cp04617a1.pdf]

Table S1 CDA results of partial orbitals HRh(CO)(P-frame)<sub>3</sub> complexes (in electron)

| configuration                       | fragment                                      | orbital | d      | b       | d-b    | r       |
|-------------------------------------|-----------------------------------------------|---------|--------|---------|--------|---------|
| HRh(CO)(P-frame) <sub>3</sub> -1(a) | (P-frame) <sub>3</sub> -1 and Rh <sup>-</sup> | HOMO-25 | 0.0176 | 0.0027  | 0.0148 | 0.0601  |
|                                     |                                               | HOMO-24 | 0.0415 | 0.0144  | 0.0271 | 0.1002  |
|                                     |                                               | HOMO-23 | 0.0371 | 0.0107  | 0.0264 | 0.0448  |
| HRh(CO)(P-frame) <sub>3</sub> -1(b) | CO and Rh <sup>-</sup>                        | HOMO-22 | 0.0435 | -0.0023 | 0.0459 | -0.2141 |
|                                     |                                               | HOMO-24 | 0.0308 | 0.0039  | 0.0269 | 0.0929  |
|                                     | (P-frame) <sub>3</sub> -1 and Rh <sup>-</sup> | HOMO-23 | 0.0508 | 0.0074  | 0.0434 | 0.0836  |
|                                     |                                               | HOMO-22 | 0.0387 | -0.0012 | 0.0399 | -0.0923 |
| HRh(CO)(P-frame) <sub>3</sub> -2(a) | CO and Rh <sup>-</sup>                        | HOMO-91 | 0.0276 | -0.0005 | 0.0280 | 0.0420  |
|                                     |                                               | HOMO-27 | 0.0313 | 0.0022  | 0.0291 | 0.0245  |
|                                     | (P-frame) <sub>3</sub> -2 and Rh <sup>-</sup> | HOMO-25 | 0.0447 | 0.0116  | 0.0331 | 0.0592  |
|                                     |                                               | HOMO-23 | 0.0382 | 0.0113  | 0.0269 | 0.0529  |
| HRh(CO)(P-frame) <sub>3</sub> -2(b) | CO 和 Rh <sup>-</sup>                          | HOMO-96 | 0.0357 | -0.0016 | 0.0373 | 0.0629  |
|                                     |                                               | HOMO-25 | 0.0555 | 0.0046  | 0.0509 | 0.0681  |
|                                     | (P-frame) <sub>3</sub> -2 and Rh <sup>-</sup> | HOMO-23 | 0.0332 | 0.0024  | 0.0307 | 0.0416  |
|                                     |                                               | HOMO-22 | 0.0386 | -0.0011 | 0.0397 | -0.1095 |
|                                     | CO and Rh <sup>-</sup>                        | HOMO-89 | 0.0164 | 0.0001  | 0.0163 | 0.0261  |

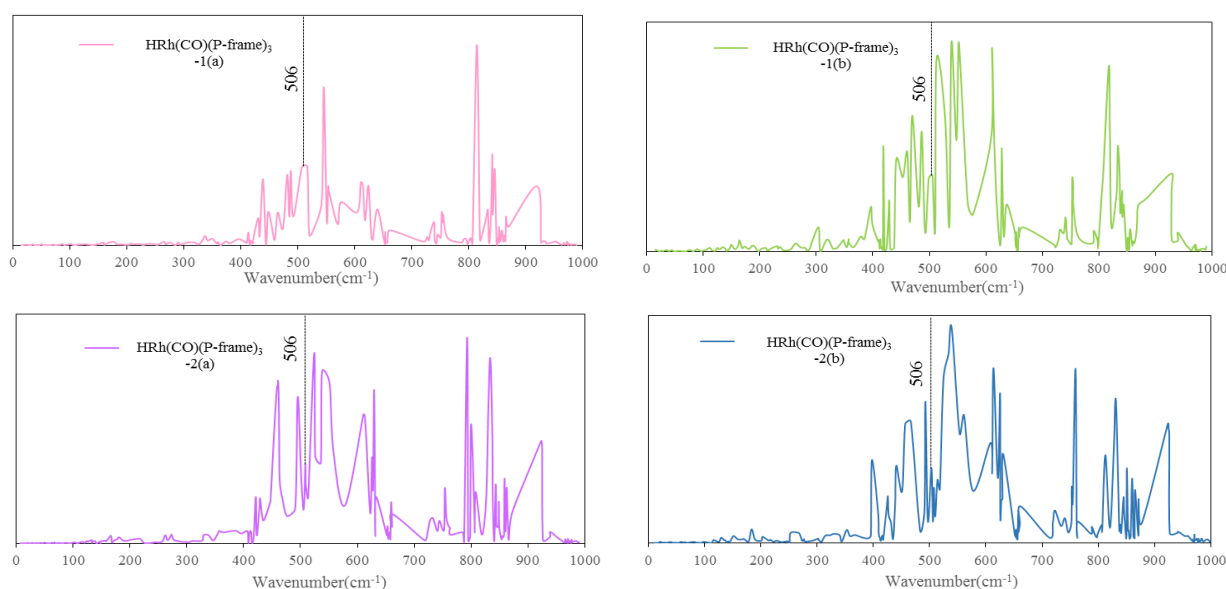

Fig. S1 FT-IR spectrum of four HRh(CO)(P-frame)<sub>3</sub> complexes

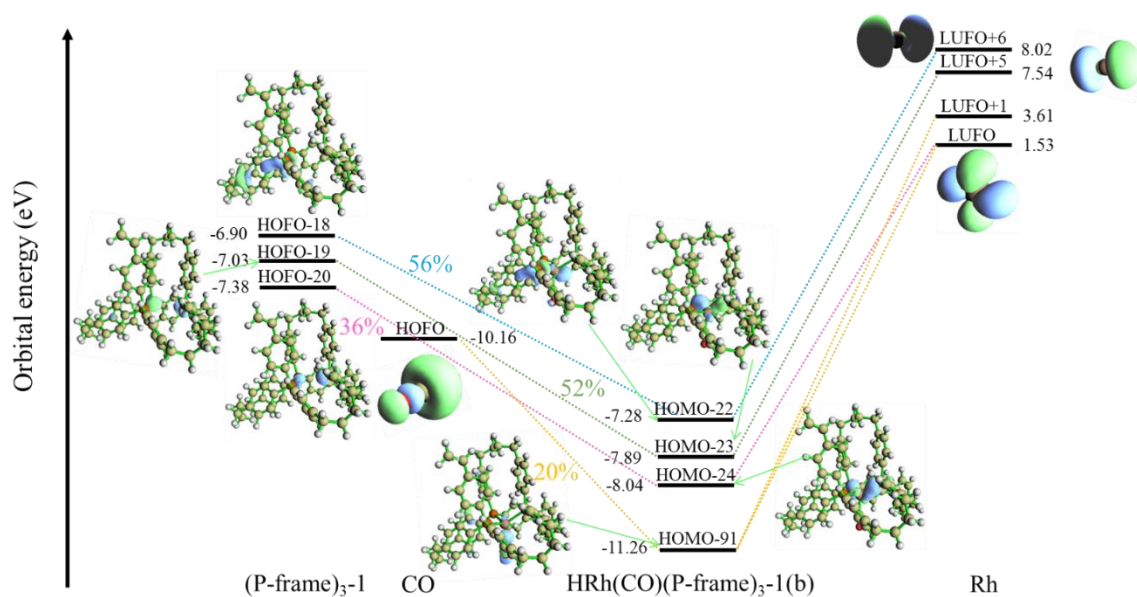

Fig. S2 The partial orbital interaction diagrams of HRh(CO)(P-frame)<sub>3</sub>-1(b) (Green and blue represents positive and negative orbital phases, respectively)

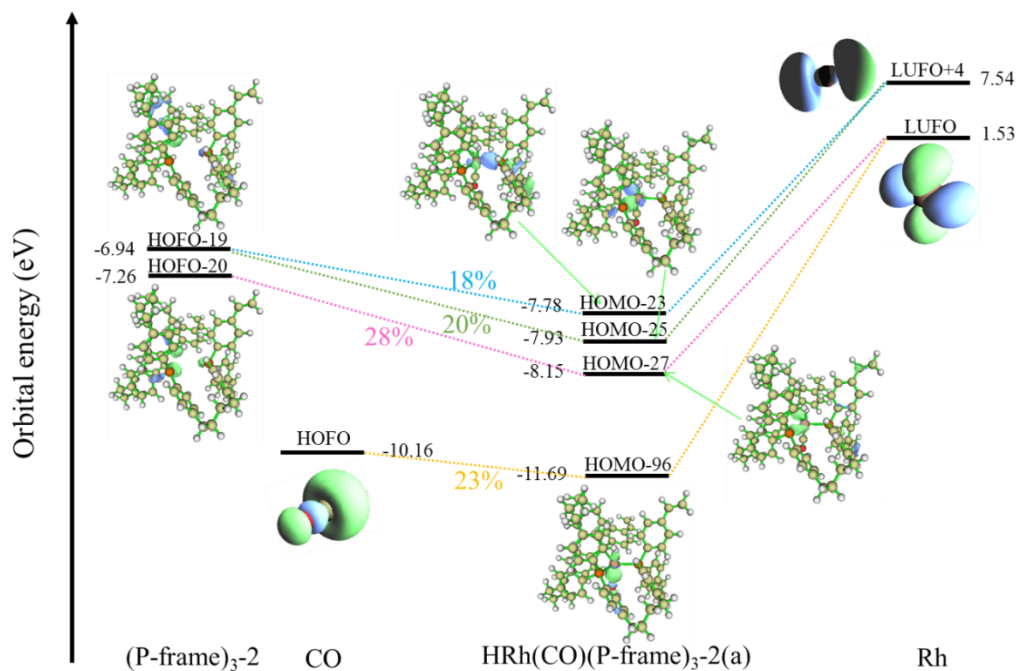

Fig. S3 The partial orbital interaction diagrams of HRh(CO)(P-frame)<sub>3</sub>-2(a) (Green and blue represents positive and negative orbital phases, respectively)

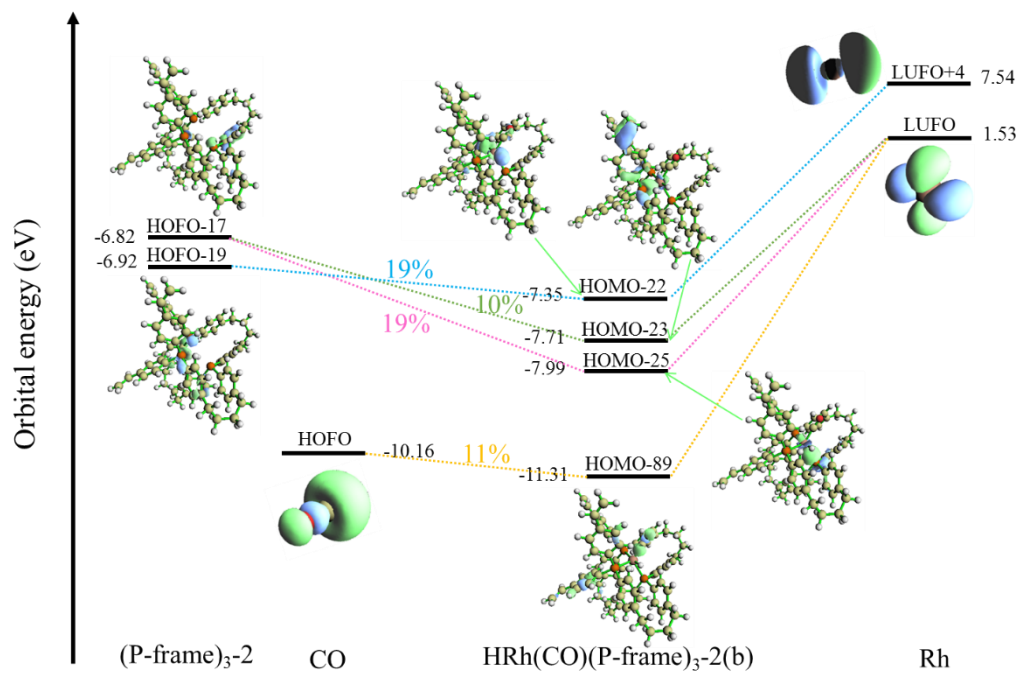

Fig. S4 The partial orbital interaction diagrams of  $HRh(CO)(P\text{-frame})_3\text{-}2(b)$  (Green and blue represents positive and negative orbital phases, respectively)
